# Supplementary material for: Probing the emissive behaviour of the lead-free Cs2AgBiCl6 double perovskite with Cu(ii) doping
Source: Royal Society of Chemistry journal article supplement (doi:10.1039/d1nj04518k), 2021-01-01
Supplement: d1nj04518k1.pdf [file d1nj04518k1.pdf]

## Supporting Information

### **Probing the Emissive Behaviour of Lead-free $\text{Cs}_2\text{AgBiCl}_6$ Double Perovskite with Cu (II) Doping**

Sukanya Ghosh,<sup>a</sup> Gaurav Kumar Nim,<sup>a</sup> Hari Shankar<sup>a</sup> and Prasenjit  
Kar<sup>a\*</sup>

<sup>a</sup>Indian Institute of Technology Roorkee, Uttarakhand-247667, India

E-mail: kar.prasen@gmail.com, prasenjit.kar@cy.iitr.ac.in

| <b>Sl No.</b> | <b>Contents</b>                                                                                                   | <b>Page No.</b> |
|---------------|-------------------------------------------------------------------------------------------------------------------|-----------------|
| 1.            | Instrumental details                                                                                              | S3-S4           |
| 2.            | PLQY data of pristine and all the doped samples ( <b>Table S1</b> )                                               | S4              |
| 3.            | XRD details of Cs <sub>2</sub> AgBiCl <sub>6</sub> ( <b>Table S2</b> )                                            | S4-S5           |
| 4.            | XRD details of 10% Cu doped Cs <sub>2</sub> AgBiCl <sub>6</sub> ( <b>Table S3</b> )                               | S5              |
| 5.            | XRD details of 20% Cu doped Cs <sub>2</sub> AgBiCl <sub>6</sub> ( <b>Table S4</b> )                               | S5              |
| 6.            | XRD details of 30% Cu doped Cs <sub>2</sub> AgBiCl <sub>6</sub> ( <b>Table S5</b> )                               | S5              |
| 7.            | XRD details of 40% Cu doped Cs <sub>2</sub> AgBiCl <sub>6</sub> ( <b>Table S6</b> )                               | S6              |
| 8.            | XRD details of 50% Cu doped Cs <sub>2</sub> AgBiCl <sub>6</sub> ( <b>Table S7</b> )                               | S6              |
| 9.            | Elemental analysis of Cs <sub>2</sub> AgBiCl <sub>6</sub> ( <b>Table S8</b> )                                     | S6              |
| 10.           | Elemental analysis of all Cu doped Cs <sub>2</sub> AgBiCl <sub>6</sub> ( <b>Table S9</b> )                        | S6              |
| 11.           | ICPMS data for all doped samples ( <b>Table S10</b> )                                                             | S7              |
| 12.           | Cu/Ag ratio by MP-AES ( <b>Table S11</b> )                                                                        | S7              |
| 13.           | Schematic energy level diagram of orbital interaction ( <b>Fig. S1</b> )                                          | S7              |
| 14.           | <sup>133</sup> Cs NMR spectra ( <b>Fig. S2</b> )                                                                  | S8              |
| 15.           | IR spectra of all the doped samples ( <b>Fig. S3</b> )                                                            | S8              |
| 16.           | FE-SEM images of 20% and 40% Cu doped Cs <sub>2</sub> AgBiCl <sub>6</sub> ( <b>Fig. S4</b> )                      | S9              |
| 17.           | SEM-EDX spectra for all the samples ( <b>Fig. S5</b> )                                                            | S9              |
| 18.           | Elemental mapping of Cs <sub>2</sub> AgBiCl <sub>6</sub> ( <b>Fig. S6</b> )                                       | S10             |
| 19.           | Elemental mapping of 10% Cu doped Cs <sub>2</sub> AgBiCl <sub>6</sub> ( <b>Fig. S7</b> )                          | S10             |
| 20.           | Elemental mapping of 20% Cu doped Cs <sub>2</sub> AgBiCl <sub>6</sub> ( <b>Fig. S8</b> )                          | S11             |
| 21.           | Elemental mapping of 30% Cu doped Cs <sub>2</sub> AgBiCl <sub>6</sub> ( <b>Fig. S9</b> )                          | S11             |
| 22.           | Elemental mapping of 40% Cu doped Cs <sub>2</sub> AgBiCl <sub>6</sub> ( <b>Fig. S10</b> )                         | S12             |
| 23.           | XPS details (survey scan and narrow scan) of 10% Cu doped Cs <sub>2</sub> AgBiCl <sub>6</sub> ( <b>Fig. S11</b> ) | S12             |
| 24.           | XPS details (survey scan and narrow scan) of 20% Cu doped Cs <sub>2</sub> AgBiCl <sub>6</sub> ( <b>Fig. S12</b> ) | S13             |
| 25.           | XPS details (survey scan and narrow scan) of 30% Cu doped Cs <sub>2</sub> AgBiCl <sub>6</sub> ( <b>Fig. S13</b> ) | S13             |
| 26.           | XPS details (survey scan and narrow scan) of 40% Cu doped Cs <sub>2</sub> AgBiCl <sub>6</sub> ( <b>Fig. S14</b> ) | S14             |
| 27.           | XPS details (survey scan and narrow scan) of 50% Cu doped Cs <sub>2</sub> AgBiCl <sub>6</sub> ( <b>Fig. S15</b> ) | S14             |
| 28.           | Stability of double perovskites by XRD ( <b>Fig. S16</b> )                                                        | S15             |

## **Instrumentation details**

### **1. Absorption and emission spectroscopy**

Optical spectra, i.e., absorption and emission studies, were done on a UV-vis spectrophotometer at room temperature. Shimadzu UV-vis 2450 spectrophotometer was used for recording UV-vis absorption spectra in the range of 200-800 nm. Photoluminescence spectra were collected by the Horiba scientific Fluoromax-4C spectrophotometer. A quartz cuvette of 10 mm path length and volume 3.0 ml was used for taking the spectra in the range of 350-700 nm wavelengths. Slit widths and step size of excitations and emissions were 5.0, 5.0, and 1.0, respectively. We have added 200  $\mu$ L of perovskite solution into 3 mL isopropanol for each cases and then recorded the spectra.

### **2. Fourier Transform Infrared Spectroscopy (FTIR) studies**

FTIR spectra of double perovskites were recorded by using Thermo scientific Nicolet 6700. The experiments were performed using the KBr pellet making technique with a scan range between 400 to 4000  $\text{cm}^{-1}$  over 64 scans at a resolution of 4  $\text{cm}^{-1}$  and an interval of 1  $\text{cm}^{-1}$ .

### **3. Powder XRD (P-XRD)**

Powder XRD was carried out on Rigaku having Target Cu  $K\alpha$  radiation of wavelength 1.54  $\text{\AA}$  and accelerating voltage 9 kW. Samples were scanned in the range of  $10^\circ$  to  $50^\circ$ . Samples were prepared in the form of a thin film on silica glass by the drop-casting method.

### **4. Field Emission Scanning Electron Microscopy (FE-SEM)**

FE-SEM Carl Zeiss Ultra Plus and Gemini 300 have been used to know about the surface morphology of double perovskites by making a thin film on a glass slide through drop casting technique. Glass slides were gold coated, and the experiment was performed at an operating voltage of 20 kV.

### **5. Transmission Electron Microscopy (TEM)**

TEM study was done by FEI TECHNAI G2 20 S-TWIN. A drop of diluted samples was deposited on a carbon-coated copper grid. Again a drop was added after drying it, and drying was carried at ambient temperature.

### **6. X-Ray Photoelectron Spectroscopy (XPS)**

Surface analysis of thin film of double perovskites has been studied on XPS with model no. PHI 5000 Versa Probe III.

### **7. Thermogravimetric analysis (TGA)**

Thermal analyses were performed on SII 6300 EXSTAR. All the samples were heated in a temperature range of 0 °C - 900 °C at a 10 °C/min heating rate under an inert atmosphere. We have spread the residue of the samples on a glass slide and dried it overnight in an oven at 80 °C to collect the powder form of samples for the TGA experiment.

#### 8. Inductively Coupled Plasma Mass Spectroscopy (ICP-MS)

Inductively coupled plasma mass spectroscopy was studied on an Inductively Coupled Plasma Quadrupole Mass Spectrometer with model ELAN DRC-e. Samples were prepared by digesting the materials in aqua-regia and then diluted with distilled water for ICP-MS study.

#### 9. Solid State Nuclear Magnetic Resonance Spectroscopy (NMR)

Solid-State Nuclear Magnetic Resonance (NMR) spectroscopy was performed in a JEOL NMR spectrometer with model ECZR Series 600 MHz NMR SPECTROMETER.

#### 10. Electro Paramagnetic Resonance Spectroscopic (EPR)

Electron paramagnetic resonance (EPR) spectroscopy was studied in Electro Paramagnetic Resonance Spectrometer with model EMXmicro A200-9.5/12/S/W at room temperature. Both the solid and liquid samples were analyzed.

#### 11. Microwave plasma atomic emission spectroscopy (MP-AES)

Microwave plasma atomic emission spectroscopy was studied on a Microwave plasma atomic emission Spectrometer with model 4210-MP-AES. Double perovskites were first digested in aqua-regia and then diluted with distilled water for the MP-AES study.

**Table S1:** PLQY data of pristine and all the doped samples.

| Samples | PLQY (%) |
|---------|----------|
| P1      | 8        |
| P2      | 1.114    |
| P3      | 0.829    |
| P4      | 0.0139   |
| P5      | 0.0088   |
| P6      | 0.0069   |

**Table S2:** XRD data of Cs<sub>2</sub>AgBiCl<sub>6</sub>.

| 2 $\Theta$ | $\Theta$ | sin $\Theta$ | sin <sup>2</sup> $\Theta$ | Ratio | d(A°) | (h k l) |
|------------|----------|--------------|---------------------------|-------|-------|---------|
| 16.90      | 8.45     | 0.146        | 0.0213                    | 1     | 5.24  | (2 0 0) |
| 23.86      | 11.93    | 0.206        | 0.0424                    | 1.99  | 3.73  | (2 2 0) |

|       |        |       |        |      |      |         |
|-------|--------|-------|--------|------|------|---------|
| 33.78 | 16.89  | 0.290 | 0.0841 | 3.94 | 2.65 | (4 0 0) |
| 41.52 | 20.76  | 0.354 | 0.1253 | 5.88 | 2.17 | (4 2 2) |
| 48.33 | 24.165 | 0.409 | 0.1672 | 7.85 | 1.88 | (4 4 0) |

a = 10.56Å

**Table S3:** XRD data of 10% Cu doped Cs<sub>2</sub>AgBiCl<sub>6</sub>.

| <b>2θ</b> | <b>θ</b> | <b>sinθ</b> | <b>sin<sup>2</sup> θ</b> | <b>Ratio</b> | <b>d(A°)</b> | <b>(h k l)</b> |
|-----------|----------|-------------|--------------------------|--------------|--------------|----------------|
| 16.90     | 8.45     | 0.146       | 0.0213                   | 1            | 5.24         | (2 0 0)        |
| 23.90     | 11.95    | 0.207       | 0.0428                   | 2.00         | 3.71         | (2 2 0)        |
| 33.78     | 16.89    | 0.290       | 0.0841                   | 3.94         | 2.65         | (4 0 0)        |
| 41.52     | 20.76    | 0.354       | 0.1253                   | 5.88         | 2.17         | (4 2 2)        |
| 48.33     | 24.165   | 0.409       | 0.1672                   | 7.85         | 1.88         | (4 4 0)        |

a = 10.49Å

**Table S4:** XRD data of 20% Cu doped Cs<sub>2</sub>AgBiCl<sub>6</sub>.

| <b>2θ</b> | <b>θ</b> | <b>sinθ</b> | <b>sin<sup>2</sup> θ</b> | <b>Ratio</b> | <b>d(A°)</b> | <b>(h k l)</b> |
|-----------|----------|-------------|--------------------------|--------------|--------------|----------------|
| 17.06     | 8.53     | 0.148       | 0.0219                   | 1            | 5.19         | (2 0 0)        |
| 24.01     | 12.005   | 0.208       | 0.0432                   | 1.97         | 3.70         | (2 2 0)        |
| 33.96     | 16.98    | 0.292       | 0.0852                   | 3.89         | 2.64         | (4 0 0)        |
| 41.63     | 20.815   | 0.355       | 0.1260                   | 5.75         | 2.17         | (4 2 2)        |
| 48.37     | 24.38    | 0.412       | 0.1697                   | 7.75         | 1.86         | (4 4 0)        |

a = 10.47Å

**Table S5:** XRD data of 30% Cu doped Cs<sub>2</sub>AgBiCl<sub>6</sub>.

| <b>2θ</b> | <b>θ</b> | <b>sinθ</b> | <b>sin<sup>2</sup> θ</b> | <b>Ratio</b> | <b>d(A°)</b> | <b>(h k l)</b> |
|-----------|----------|-------------|--------------------------|--------------|--------------|----------------|
| 17.33     | 8.665    | 0.150       | 0.0225                   | 1            | 5.11         | (2 0 0)        |
| 24.23     | 12.115   | 0.209       | 0.0436                   | 1.94         | 3.67         | (2 2 0)        |
| 34.12     | 17.06    | 0.293       | 0.0858                   | 3.81         | 2.62         | (4 0 0)        |
| 41.86     | 20.93    | 0.357       | 0.1274                   | 5.66         | 2.15         | (4 2 2)        |
| 48.60     | 24.30    | 0.411       | 0.1689                   | 7.51         | 1.87         | (4 4 0)        |

a = 10.39Å

Table  
data of  
doped

S6: XRD  
40% Cu

| $2\Theta$ | $\Theta$ | $\sin\Theta$ | $\sin^2 \Theta$ | Ratio | $d(\text{\AA})$ | (h k l) |
|-----------|----------|--------------|-----------------|-------|-----------------|---------|
| 17.51     | 8.755    | 0.152        | 0.0231          | 1     | 5.06            | (2 0 0) |
| 24.35     | 12.175   | 0.210        | 0.0441          | 1.91  | 3.65            | (2 2 0) |
| 34.23     | 17.115   | 0.294        | 0.0864          | 3.74  | 2.62            | (4 0 0) |
| 41.97     | 20.985   | 0.358        | 0.1281          | 5.54  | 2.15            | (4 2 2) |
| 48.71     | 24.355   | 0.412        | 0.1697          | 7.34  | 1.87            | (4 4 0) |

$\text{Cs}_2\text{AgBiCl}_6$ .

$a = 10.33\text{\AA}$

Table S7: XRD data of 50% Cu doped  $\text{Cs}_2\text{AgBiCl}_6$ .

| $2\Theta$ | $\Theta$ | $\sin\Theta$ | $\sin^2 \Theta$ | Ratio | $d(\text{\AA})$ | (h k l) |
|-----------|----------|--------------|-----------------|-------|-----------------|---------|
| 17.62     | 8.81     | 0.153        | 0.0234          | 1     | 5.03            | (2 0 0) |
| 24.57     | 12.285   | 0.212        | 0.0449          | 1.92  | 3.62            | (2 2 0) |
| 34.44     | 17.22    | 0.296        | 0.0876          | 3.74  | 2.60            | (4 0 0) |
| 42.20     | 21.10    | 0.359        | 0.1288          | 5.50  | 2.13            | (4 2 2) |
| 48.82     | 24.41    | 0.413        | 0.1705          | 7.29  | 1.86            | (4 4 0) |

$a = 10.24\text{\AA}$

Table S8: Composition of  $\text{Cs}_2\text{AgBiCl}_6$  using EDX analysis.

| Element | Weight % | Atomic % |
|---------|----------|----------|
| Cs (L)  | 32.93    | 20.21    |
| Ag (L)  | 27.11    | 10.58    |
| Bi (M)  | 14.71    | 11.12    |
| Cl (K)  | 25.25    | 58.09    |

Table S9: SEM-EDX of all the doped samples.

| Sample | Atomic% | Atomic% | Atomic% | Atomic% | Atomic% | Ratio of |
|--------|---------|---------|---------|---------|---------|----------|
|--------|---------|---------|---------|---------|---------|----------|

| name | of Cs | of Ag | of Bi | of Cl | of Cu | Cu/Ag  |
|------|-------|-------|-------|-------|-------|--------|
| P2   | 17.91 | 13.21 | 10.82 | 57.77 | 0.30  | 0.0227 |
| P3   | 17.98 | 11.76 | 9.83  | 60.06 | 0.37  | 0.0314 |
| P4   | 19.31 | 11.61 | 10.00 | 58.50 | 0.57  | 0.0491 |
| P5   | 20.06 | 10.89 | 9.40  | 59.03 | 0.62  | 0.0569 |
| P6   | 19.00 | 9.52  | 9.77  | 61.08 | 0.63  | 0.0662 |

**Table S10:** ICPMS data for all the doped samples.

| % of Cu taken in the precursor | % of Cu present in the product |
|--------------------------------|--------------------------------|
| 10                             | 1.18                           |
| 20                             | 2.82                           |
| 30                             | 3.42                           |
| 40                             | 6.04                           |
| 50                             | 6.41                           |

**Table S11:** Cu/Ag ratio in the double perovskites in MP-AES data.

| Sample name | Cu/Ag ratio |
|-------------|-------------|
| P1          | 0           |
| P2          | 0.100       |
| P3          | 0.108       |
| P4          | 0.134       |
| P5          | 0.144       |
| P6          | 0.185       |

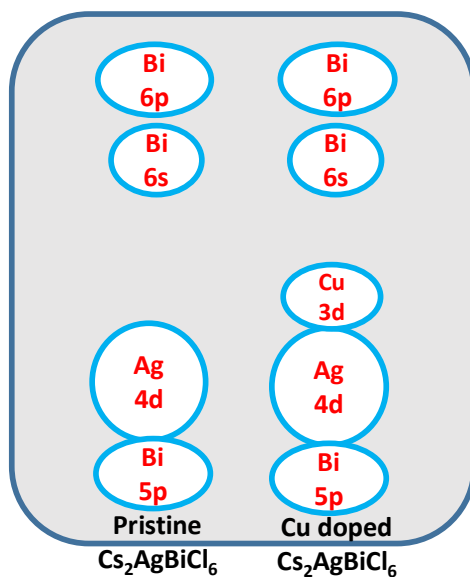

**Fig. S1:** Schematic representation of orbital interaction in undoped and Cu doped double perovskite.

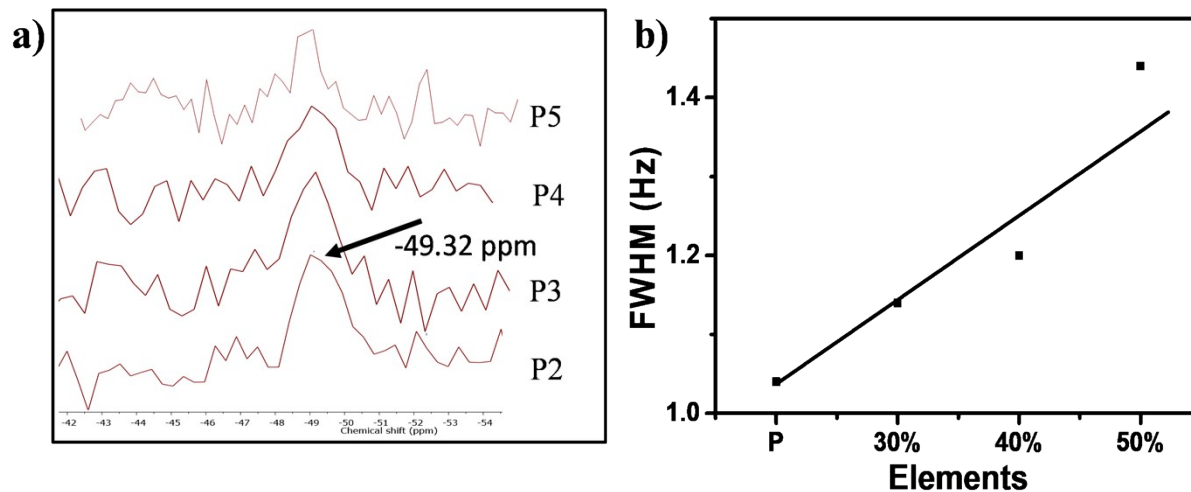

**Fig. S2:** a)  $^{133}\text{Cs}$  NMR spectra of Cu doped samples, b) FWHM of Cs peak at 78 ppm.

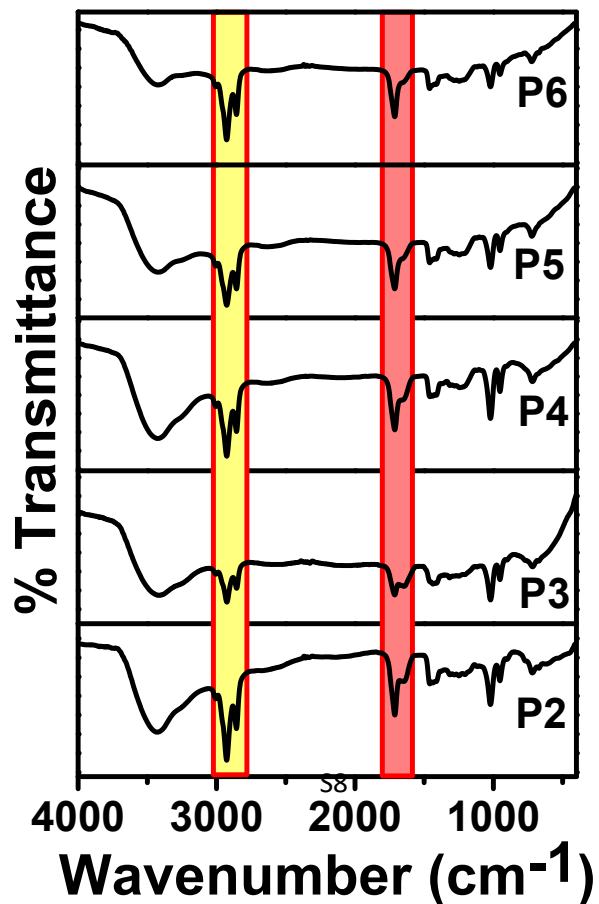



**Fig. S3:** IR spectra of all the doped samples.

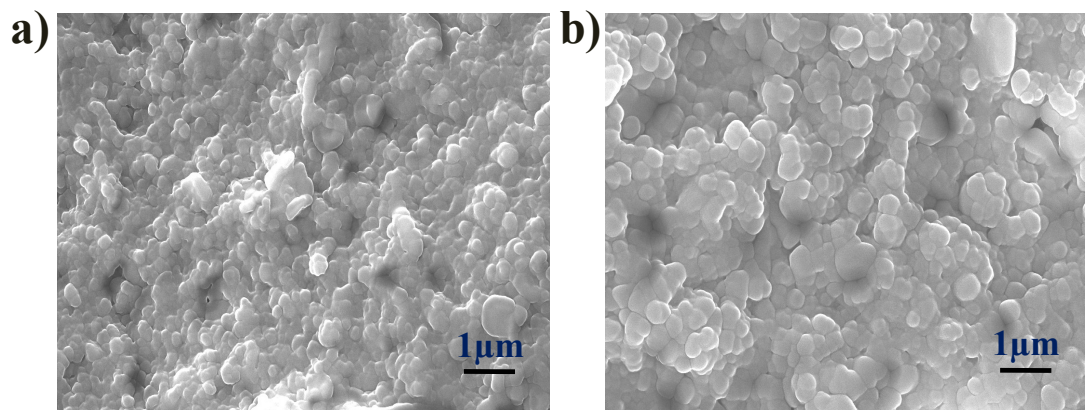

**Fig. S4:** SEM images of 20 % (a) and 40 % (b) Cu doped in  $\text{Cs}_2\text{AgBiCl}_6$  respectively.

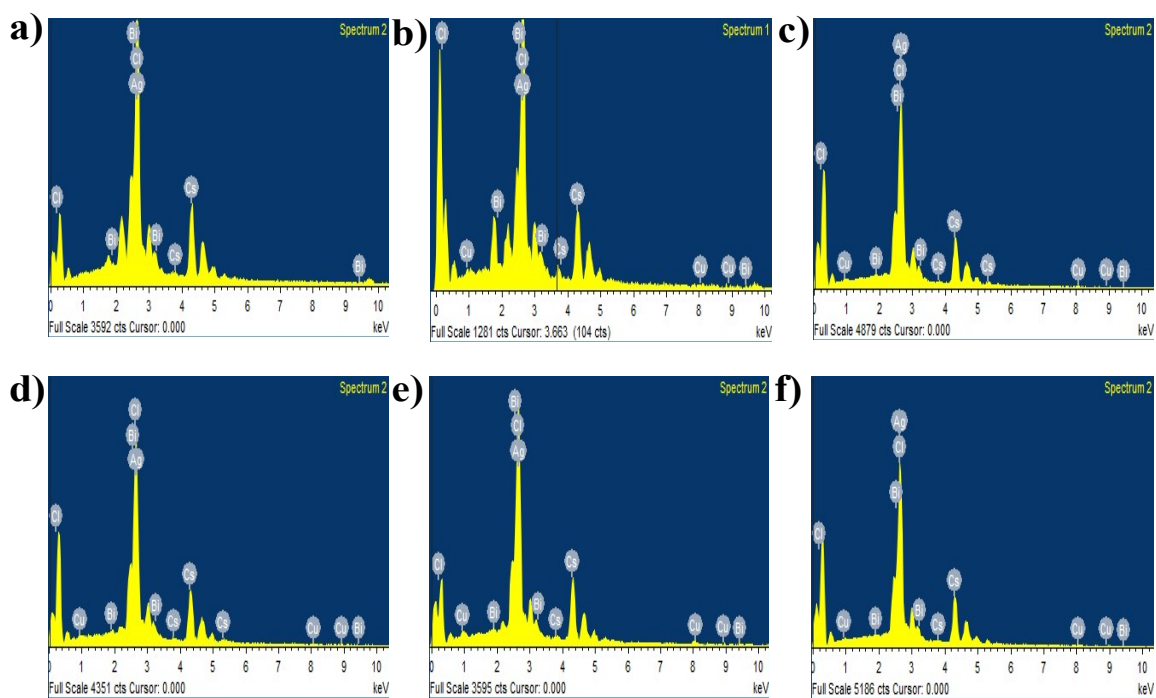

**Fig. S5:** SEM-EDX of pristine and all the doped (10%, 20%, 30%, 40%, 50%) samples respectively.

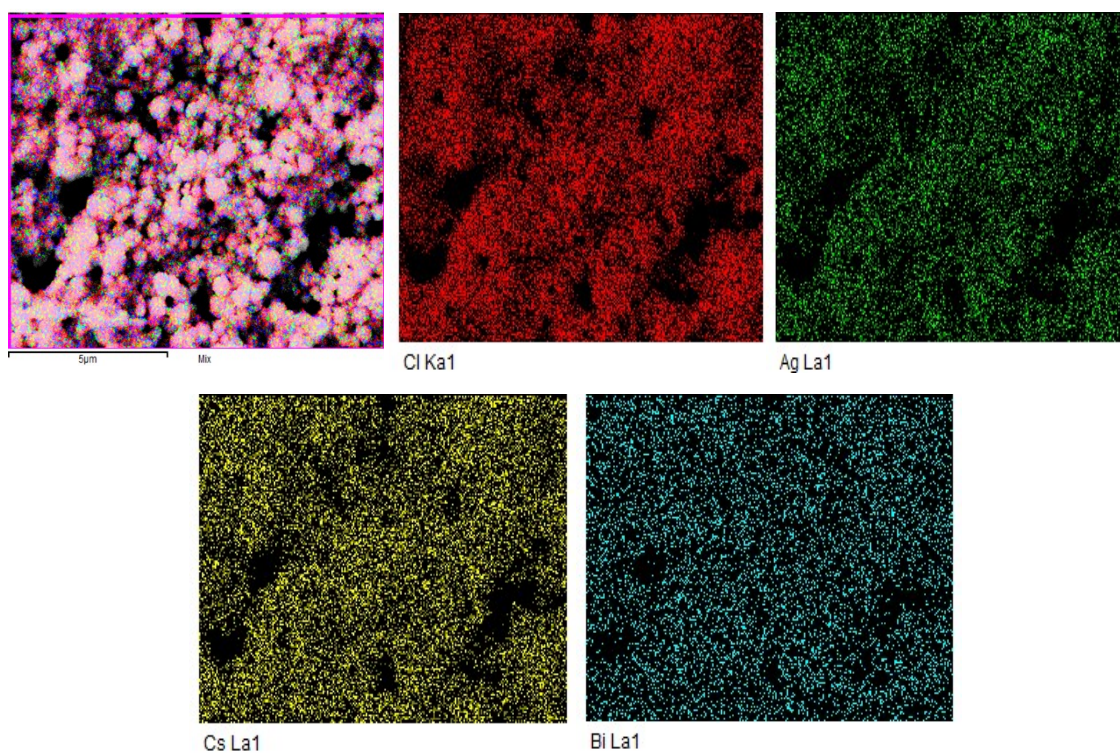

**Fig. S6:** Elemental mapping of  $\text{Cs}_2\text{AgBiCl}_6$  by SEM analysis.

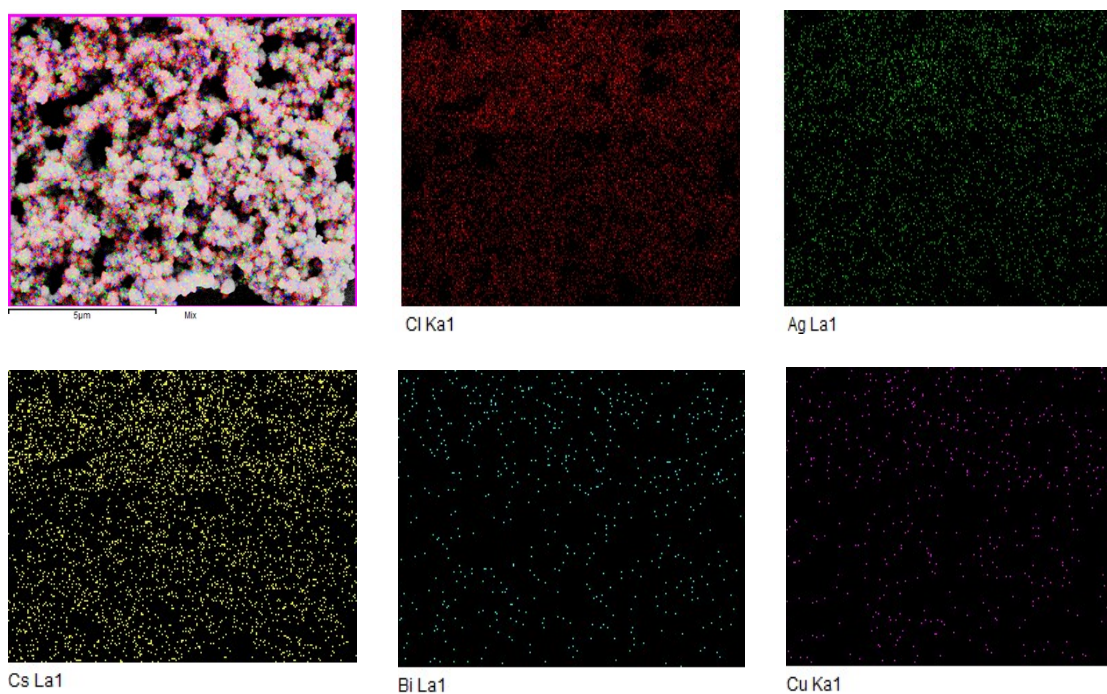

**Fig. S7:** Elemental mapping of 10% Cu doped  $\text{Cs}_2\text{AgBiCl}_6$  by SEM analysis.

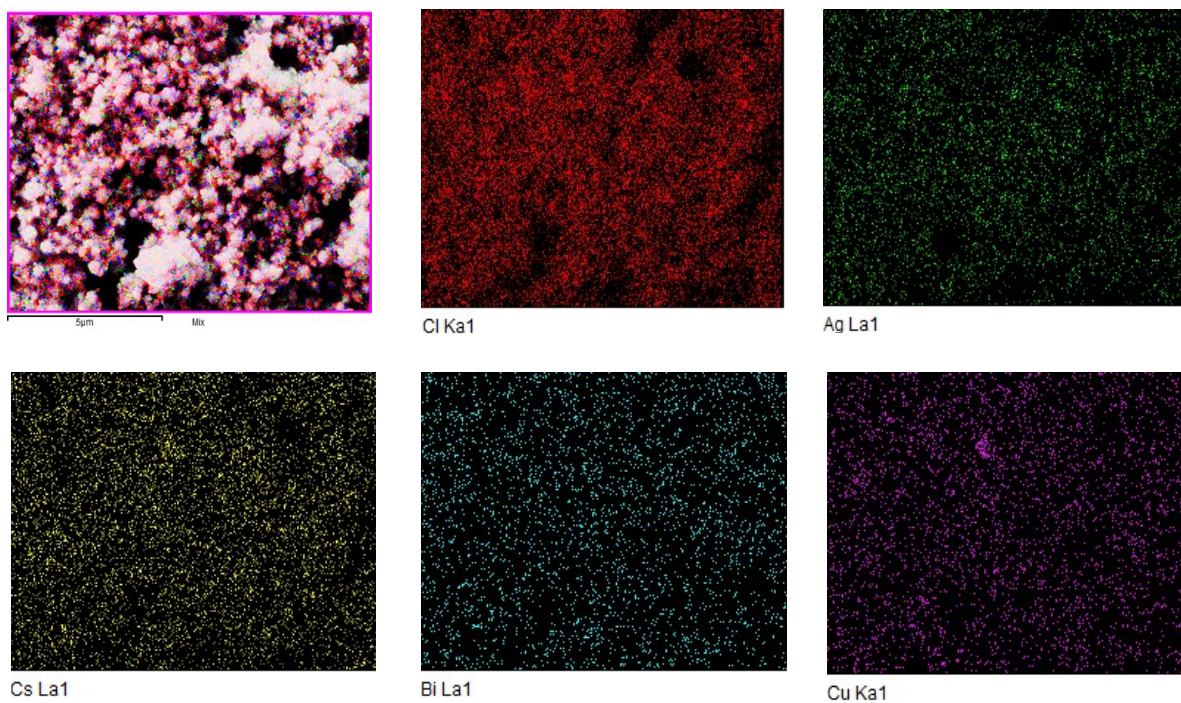

**Fig. S8:** Elemental mapping of 20% Cu doped  $\text{Cs}_2\text{AgBiCl}_6$  by SEM analysis.

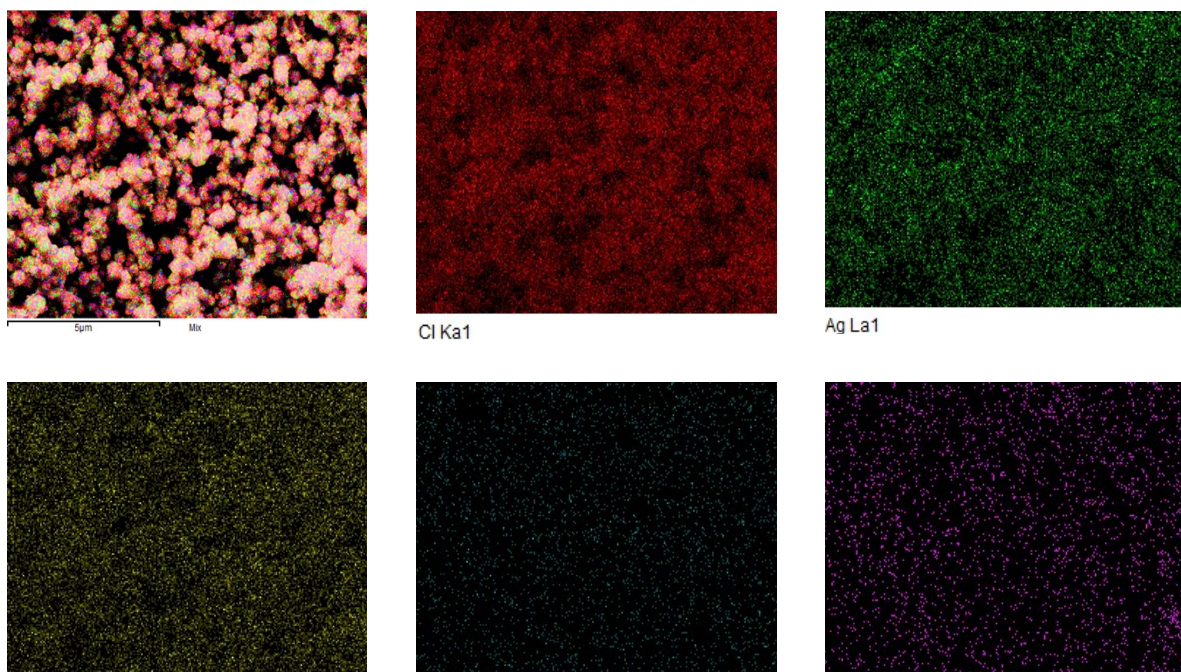

**Fig. S9:** Elemental mapping of 30% Cu doped  $\text{Cs}_2\text{AgBiCl}_6$  by SEM analysis.

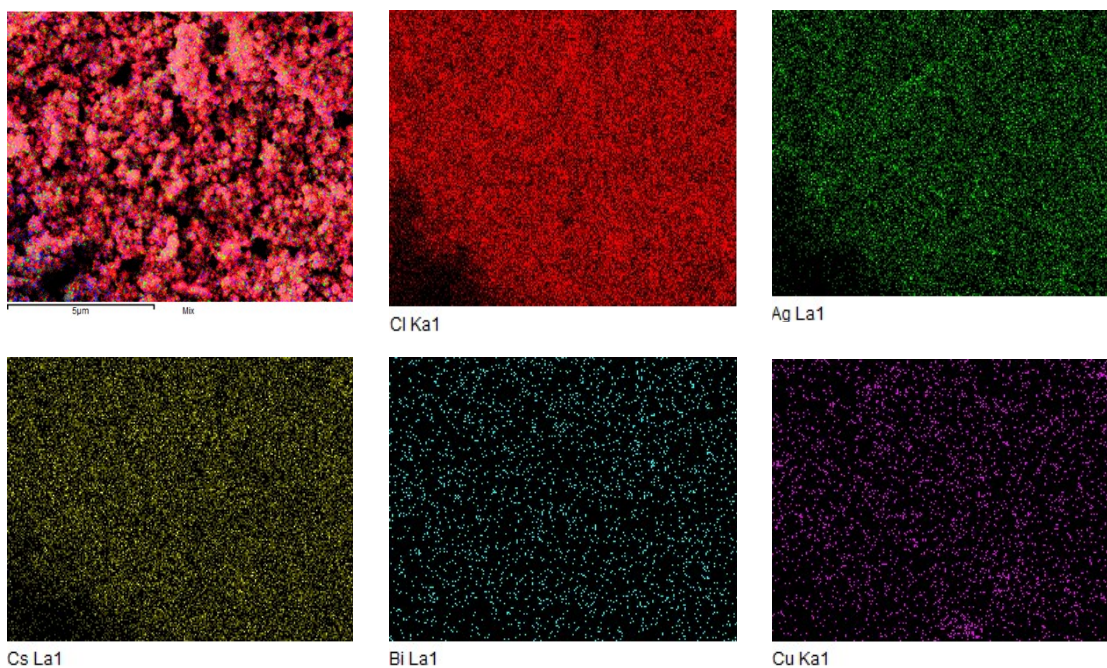

**Fig. S10:** Elemental mapping of 40% Cu doped  $\text{Cs}_2\text{AgBiCl}_6$  by SEM analysis.

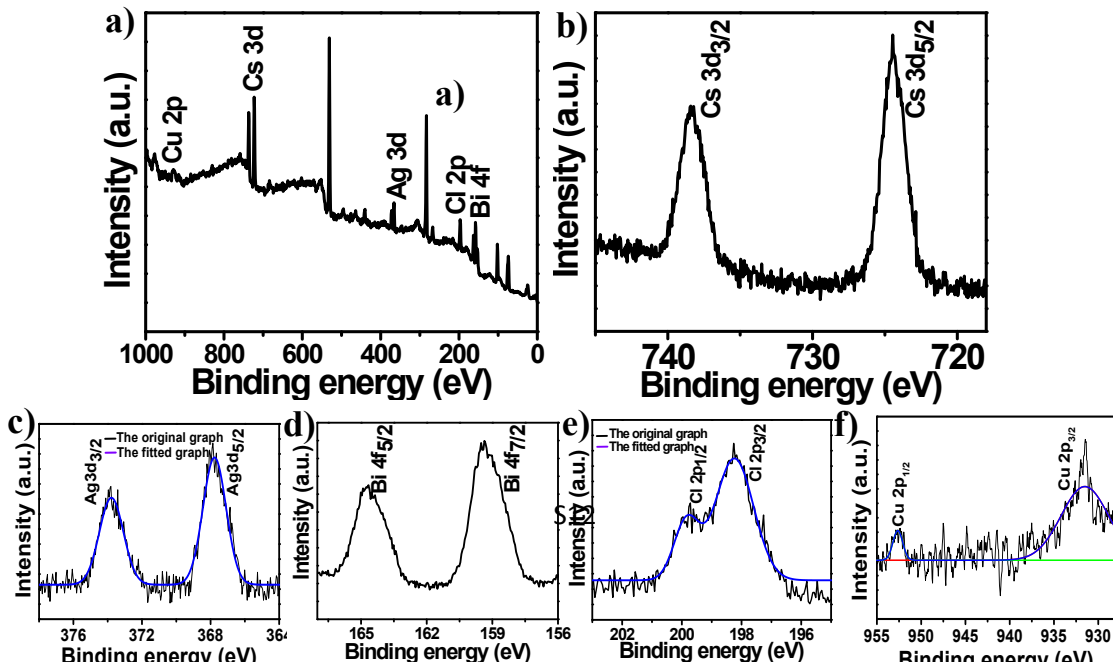

**Fig. S11:** a) XPS survey scan of 10% Cu doped  $\text{Cs}_2\text{AgBiCl}_6$ , b) narrow scan of  $\text{Cs}^+$ , c) narrow scan of  $\text{Ag}^+$ , d) narrow scan of  $\text{Bi}^{3+}$ , e) narrow scan of  $\text{Cl}^-$ , f) narrow scan of  $\text{Cu}^{2+}$ .

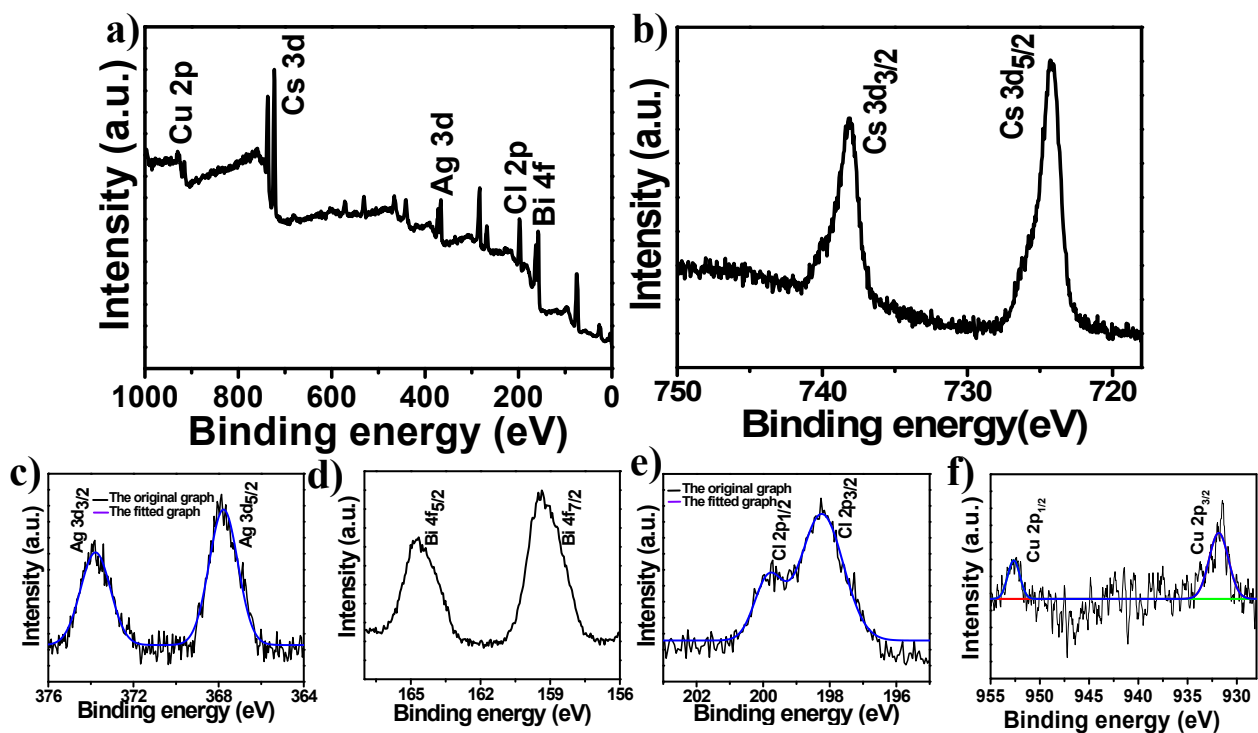

**Fig. S12:** a) XPS survey scan of 20% Cu doped  $\text{Cs}_2\text{AgBiCl}_6$ , b) narrow scan of  $\text{Cs}^+$ , c) narrow scan of  $\text{Ag}^+$ , d) narrow scan of  $\text{Bi}^{3+}$ , e) narrow scan of  $\text{Cl}^-$ , f) narrow scan of  $\text{Cu}^{2+}$ .

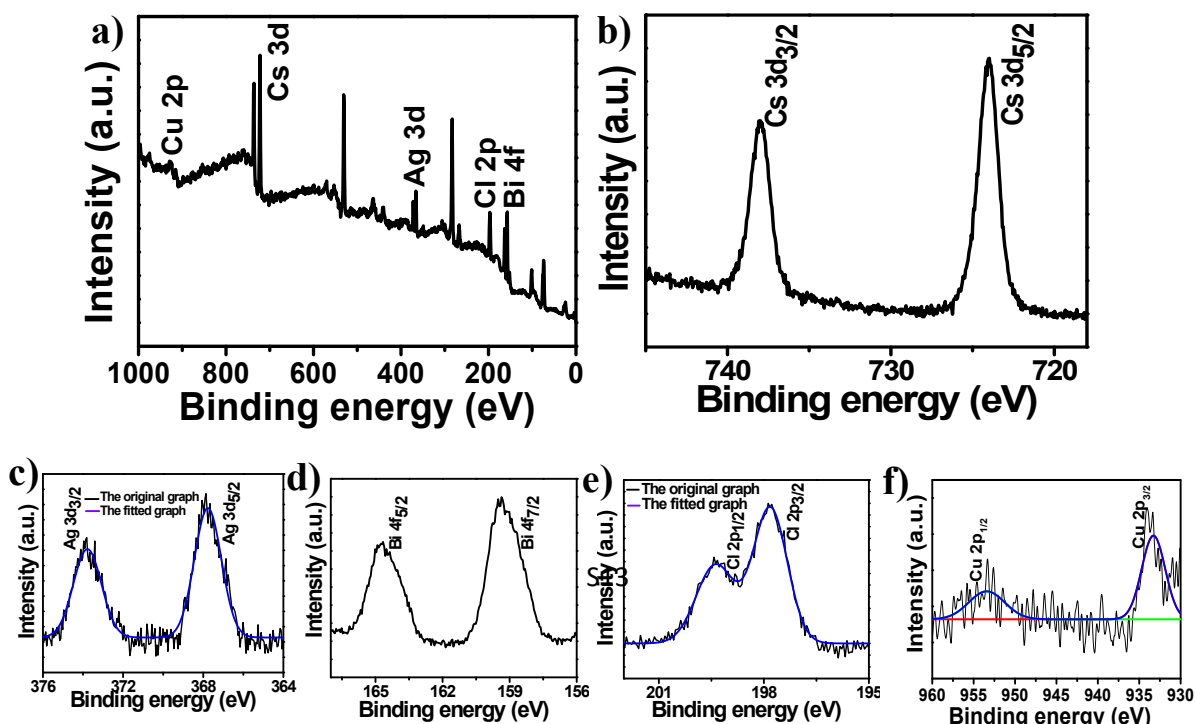

**Fig. S13:** a) XPS survey scan of 30% Cu doped  $\text{Cs}_2\text{AgBiCl}_6$ , b) narrow scan of  $\text{Cs}^+$ , c) narrow scan of  $\text{Ag}^+$ , d) narrow scan of  $\text{Bi}^{3+}$ , e) narrow scan of  $\text{Cl}^-$ , f) narrow scan of  $\text{Cu}^{2+}$ .

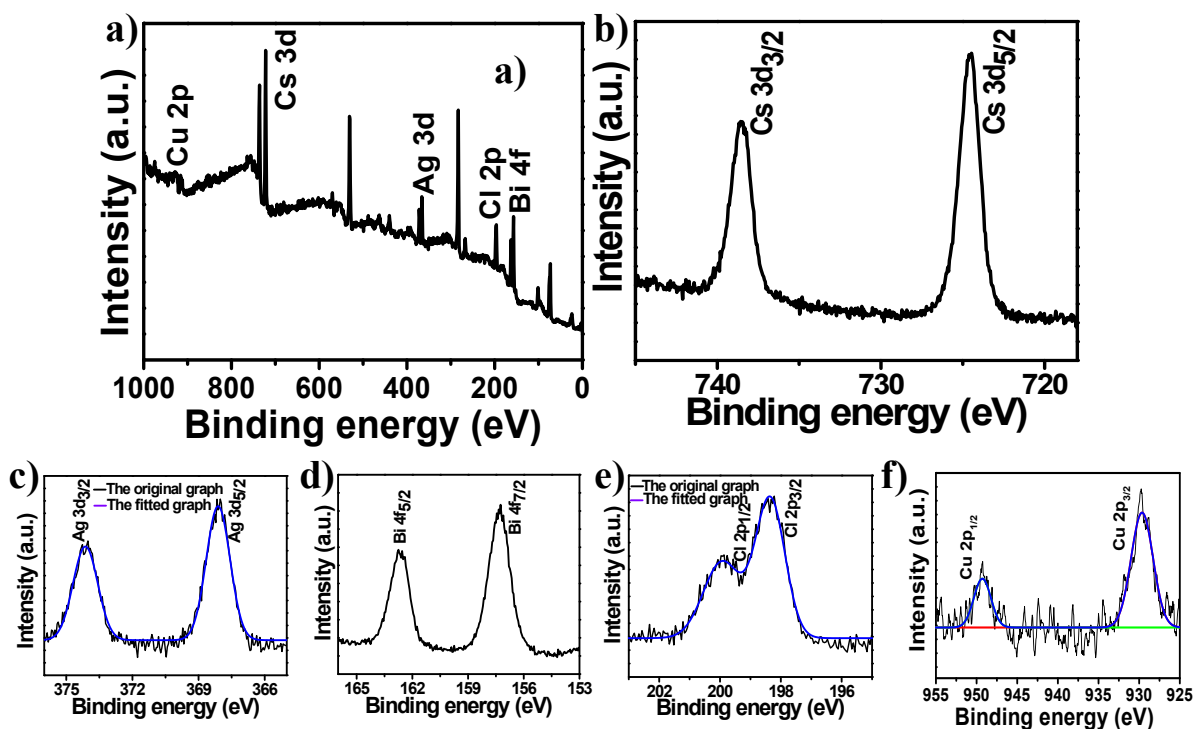

**Fig. S14:** a) XPS survey scan of 40% Cu doped  $\text{Cs}_2\text{AgBiCl}_6$ , b) narrow scan of  $\text{Cs}^+$ , c) narrow scan of  $\text{Ag}^+$ , d) narrow scan of  $\text{Bi}^{3+}$ , e) narrow scan of  $\text{Cl}^-$ , f) narrow scan of  $\text{Cu}^{2+}$ .

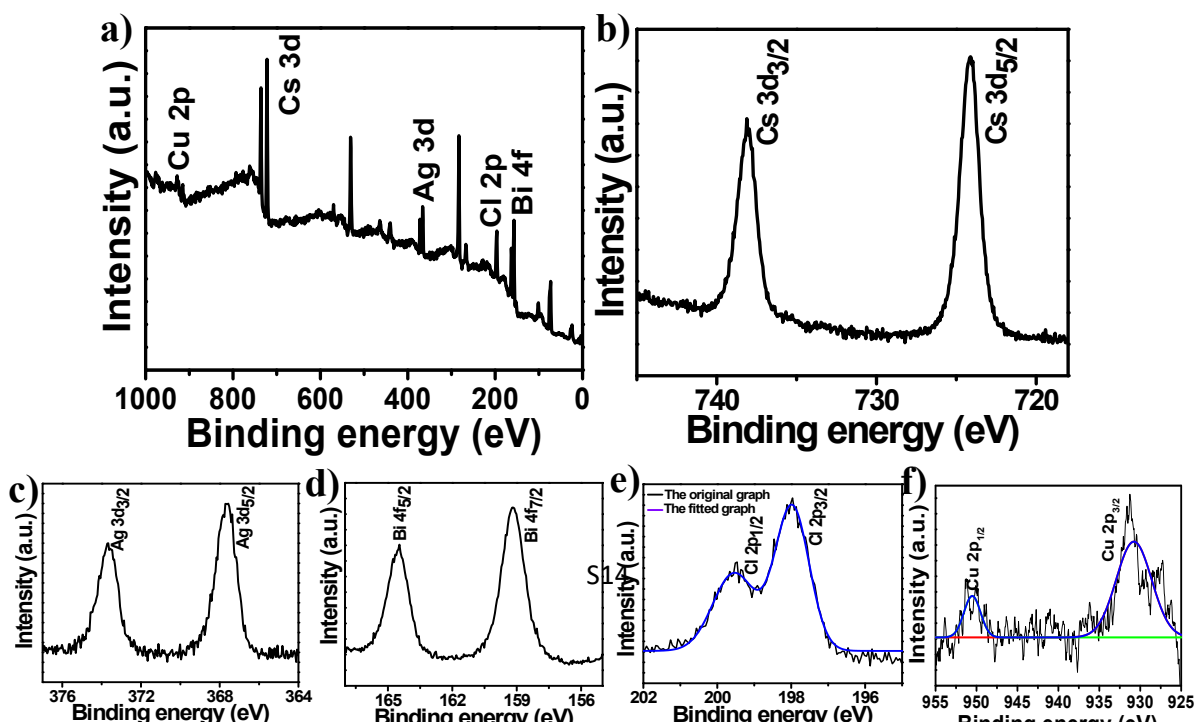

**Fig. S15:** a) XPS survey scan of 50% Cu doped  $\text{Cs}_2\text{AgBiCl}_6$ , b) narrow scan of  $\text{Cs}^+$ , c) narrow scan of  $\text{Ag}^+$ , d) narrow scan of  $\text{Bi}^{3+}$ , e) narrow scan of  $\text{Cl}^-$ , f) narrow scan of  $\text{Cu}^{2+}$ .

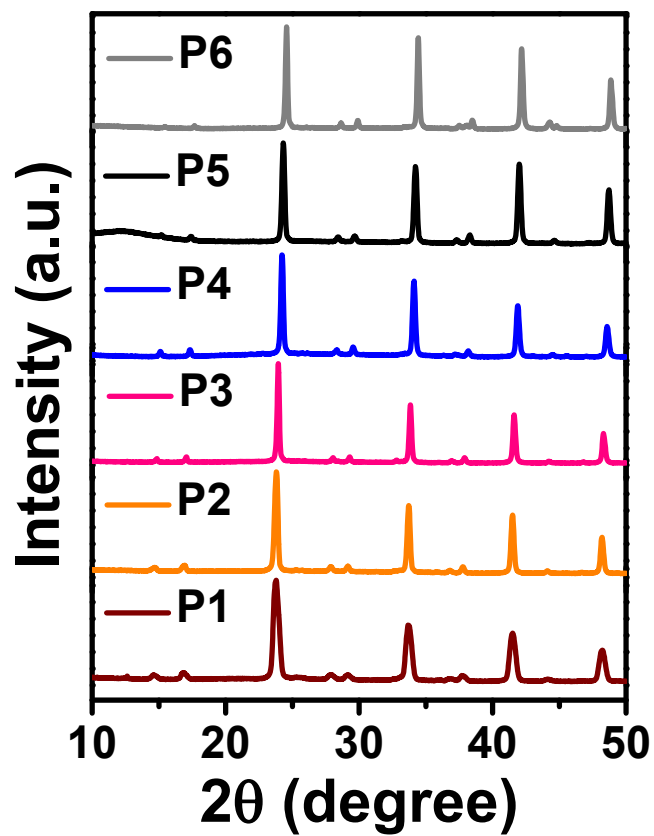

**Fig. S16:** P-XRD data of all the samples after two months.
